# Supplementary material for: Tracking Mycoviruses in Public RNAseq Datasets of Malassezia: Three Original Totiviruses Revealed
Source: MDPI journal article supplement (doi:10.3390/v15061368), 2023-06-13
Supplement: s1 [file s1]

**Supplementary Table S2. Candidate mycovirus-like sequences from *Malassezia* RNA-seq datasets.**

| BLASTX / BLASTP           |                          |                   |                                      |             |                                              |                |            |            |                |             |               |              |            |
|---------------------------|--------------------------|-------------------|--------------------------------------|-------------|----------------------------------------------|----------------|------------|------------|----------------|-------------|---------------|--------------|------------|
| Fungal Host               | BioProject and SRA ID(s) | Citation for Data | Contig (ORF)                         | Length(a a) | Hit with highest score in Blastp vs NR(NCBI) | Segment Number | Length(aa) | Accession  | Protein ID     | Query Cover | % aa identity | Virus Family | VirusClass |
| <i>Malassezia globosa</i> | PRJNA286710 (SRR2073303) | (GIS)             | DN4160_c0_g3_i1.p1                   | 767         | Erysiphe necator associated totivirus 7      | 1              | 796        | QJW70337   | RdRp           | 99%         | 46.87%        | Totiviridae  | dsRNA      |
|                           |                          |                   | DN4160_c0_g2_i1.p1                   | 305         | Totiviridae sp.                              | 1              | 693        | WAK77569.1 | capsid protein | 96%         | 41.22%        |              |            |
|                           |                          |                   | DN4160_c0_g3_i1.p2                   | 260         |                                              | 2              |            |            |                | 95%         | 37.85%        |              |            |
|                           | (SRR2072161)             | (GIS)             | DN603_c1_g3_i1.p1                    | 753         | Erysiphe necator associated totivirus 7      | 1              | 796        | QJW70337   | RdRp           | 99%         | 47.59%        | Totiviridae  | dsRNA      |
|                           |                          |                   | DN603_c1_g2_i1.p1                    | 419         | Totiviridae sp.                              | 1              | 693        | WAK77569.1 | capsid protein | 97%         | 41.84%        |              |            |
|                           |                          |                   | DN603_c1_g1_i1.p1                    | 428         |                                              | 2              |            |            |                | 99%         | 42.19%        |              |            |
|                           |                          |                   | DN603_c1_g3_i1.p2                    | 269         |                                              | 3              |            |            |                | 98%         | 36.43%        |              |            |
|                           | (SRR2072162)             | (GIS)             | DN1126_c0_g1_i1.p1                   | 767         | Erysiphe necator associated totivirus 7      | 1              | 796        | QJW70337   | RdRp           | 99%         | 46.87%        | Totiviridae  | dsRNA      |
|                           |                          |                   | DN1126_c0_g1_i1.p2                   | 267         | Totiviridae sp.                              | 1              | 693        | WAK77569.1 | capsid protein | 92%         | 37.85%        |              |            |
|                           |                          |                   | DN1126_c0_g3_i1.p1                   | 433         |                                              | 2              |            |            |                | 95%         | 42.17%        |              |            |
|                           |                          |                   | DN1126_c0_g3_i2.p1                   | 443         |                                              | 3              |            |            |                | 96%         | 42.19%        |              |            |
|                           | (SRR2073318)             | (GIS)             | DN864_c0_g3_i1.p1                    | 716         | Erysiphe necator associated totivirus 7      | 1              | 796        | QJW70337   | RdRP           | 99%         | 47.89%        | Totiviridae  | dsRNA      |
|                           |                          |                   | DN864_c0_g2_i1.p1                    | 419         | Totiviridae sp.                              | 1              | 693        | WAK77569.1 | capsid protein | 97%         | 41.89%        |              |            |
|                           |                          |                   | DN864_c0_g4_i1.p1                    | 434         |                                              | 2              |            |            |                | 98%         | 42.19%        |              |            |
|                           | (SRR2072153)             | (GIS)             | DN461_c1_g1_i1.p1                    | 767         | Erysiphe necator associated totivirus 7      | 1              | 796        | QJW70337   | RdRP           | 99%         | 46.87%        | Totiviridae  | dsRNA      |
|                           |                          |                   | DN461_c1_g1_i1.p2                    | 688         | Totiviridae sp.                              | 1              | 693        | WAK77569.1 | capsid protein | 98%         | 40.00%        |              |            |
|                           | (SRR2072157)             | (GIS)             | DN3320_c1_g2_i1.p1                   | 767         | Erysiphe necator associated totivirus 7      | 1              | 796        | QJW70337   | RdRp           | 99%         | 46.87%        | Totiviridae  | dsRNA      |
|                           |                          |                   | DN3320_c1_g1_i1.p1                   | 262         | Totiviridae sp.                              | 1              | 693        | WAK77569.1 | capsid protein | 93%         | 40.98%        |              |            |
|                           |                          |                   | DN3320_c1_g2_i1.p2                   | 688         |                                              | 2              |            |            |                | 98%         | 40.00%        |              |            |
|                           | (SRR2072163)             | (GIS)             | DN765_c1_g1_i1.p1                    | 723         | Erysiphe necator associated totivirus 7      | 1              | 796        | QJW70337   | RdRp           | 100%        | 47.51%        | Totiviridae  | dsRNA      |
|                           |                          |                   | DN765_c1_g2_i1.p2                    | 670         | Erysiphe necator associated totivirus 7      | 2              |            |            |                | 95%         | 50.55%        |              |            |
|                           |                          |                   | DN765_c1_g1_i1.p2, DN765_c1_g2_i1.p1 | 688         | Totiviridae sp.                              | 2              | 693        | WAK77569.1 | capsid protein | 98%         | 40.00%        |              |            |
|                           | (SRR2072150)             | (GIS)             | DN527_c1_g1_i1.p1                    | 767         | Erysiphe necator associated totivirus 7      | 1              | 796        | QJW70337   | RdRp           | 99%         | 46.87%        | Totiviridae  | dsRNA      |
|                           |                          |                   | DN527_c1_g1_i1.p2                    | 688         | Totiviridae sp.                              | 1              | 693        | WAK77569.1 | capsid protein | 98%         | 40.00%        |              |            |
|                           | (SRR2072151)             | (GIS)             | DN616_c2_g1_i1.p1, DN616_c2_g2_i1.p1 | 767         | Erysiphe necator associated totivirus 7      | 2              | 796        | QJW70337   | RdRp           | 99%         | 46.87%        | Totiviridae  | dsRNA      |

|              |       |                                        |                   |                                         |                 |     |            |                |                |        |             |       |  |
|--------------|-------|----------------------------------------|-------------------|-----------------------------------------|-----------------|-----|------------|----------------|----------------|--------|-------------|-------|--|
|              |       |                                        | DN616_c2_g2_i1.p2 | 688                                     | Totiviridae sp. | 1   | 693        | WAK77569.1     | capsid protein | 98%    | 40.00%      |       |  |
| (SRR2072152) | (GIS) | DN94_c1_g1_i1.p1                       | 767               | Erysiphe necator associated totivirus 7 | 1               | 796 | QJW70337   | RdRp           | 99%            | 46.87% | Totiviridae | dsRNA |  |
|              |       | DN94_c1_g1_i1.p2                       | 688               | Totiviridae sp.                         | 1               | 693 | WAK77569.1 | capsid protein | 98%            | 40.00% |             |       |  |
| (SRR2072154) | (GIS) | DN271_c0_g1_i1.p1                      | 767               | Erysiphe necator associated totivirus 7 | 1               | 796 | QJW70337   | RdRp           | 99%            | 46.87% | Totiviridae | dsRNA |  |
|              |       | DN271_c0_g1_i1.p2                      | 688               | Totiviridae sp.                         | 1               | 693 | WAK77569.1 | capsid protein | 98%            | 40.00% |             |       |  |
| (SRR2072158) | (GIS) | DN1612_c1_g2_i1.p1                     | 742               | Erysiphe necator associated totivirus 7 | 1               | 796 | QJW70337   | RdRp           | 99%            | 47.57% | Totiviridae | dsRNA |  |
|              |       | DN1612_c1_g3_i1.p1                     | 420               | Totiviridae sp.                         | 1               | 693 | WAK77569.1 | capsid protein | 98%            | 42.17% |             |       |  |
|              |       | DN1612_c1_g1_i1.p1                     | 438               |                                         | 2               |     |            |                | 97%            | 42.19% |             |       |  |
| (SRR2072159) | (GIS) | DN718_c0_g2_i1.p1                      | 767               | Erysiphe necator associated totivirus 7 | 1               | 796 | QJW70337   | RdRp           | 97%            | 46.87% | Totiviridae | dsRNA |  |
|              |       | DN718_c0_g2_i1.p2                      | 688               | Totiviridae sp.                         | 1               | 693 | WAK77569.1 | capsid protein | 98%            | 40.00% |             |       |  |
|              |       | DN718_c0_g1_i1.p1                      | 159               |                                         | 2               |     |            |                | 97%            | 42.58% |             |       |  |
| (SRR2072129) | (GIS) | DN172_c0_g1_i1.p1                      | 767               | Erysiphe necator associated totivirus 7 | 1               | 796 | QJW70337   | RdRp           | 99%            | 46.87% | Totiviridae | dsRNA |  |
|              |       | DN172_c0_g1_i1.p2                      | 688               | Totiviridae sp.                         | 1               | 693 | WAK77569.1 | capsid protein | 98%            | 40.00% |             |       |  |
|              |       | DN172_c0_g2_i1.p1                      | 610               |                                         | 2               |     |            |                | 99%            | 41.12% |             |       |  |
| (SRR2072130) | (GIS) | DN4202_c0_g2_i1.p1, DN4202_c0_g1_i1.p1 | 767               | Erysiphe necator associated totivirus 7 | 2               | 796 | QJW70337   | RdRp           | 99%            | 46.87% | Totiviridae | dsRNA |  |
|              |       | DN4202_c0_g2_i1.p2, DN4202_c0_g1_i1.p2 | 688               | Totiviridae sp.                         | 2               | 693 | WAK77569.1 | capsid protein | 98%            | 40.00% |             |       |  |
| (SRR2072131) | (GIS) | DN3768_c1_g1_i1.p1                     | 767               | Erysiphe necator associated totivirus 7 | 1               | 796 | QJW70337   | RdRp           | 99%            | 46.87% | Totiviridae | dsRNA |  |
|              |       | DN3768_c1_g1_i1.p2                     | 688               | Totiviridae sp.                         | 1               | 689 | WAK77569.1 | capsid protein | 98%            | 40.00% |             |       |  |
| (SRR2072147) | (GIS) | DN3904_c0_g3_i1.p1                     | 767               | Erysiphe necator associated totivirus 7 | 1               | 796 | QJW70337   | RdRp           | 99%            | 46.87% | Totiviridae | dsRNA |  |
|              |       | DN3904_c0_g2_i1.p1                     | 438               | Totiviridae sp.                         | 1               | 693 | WAK77569.1 | capsid protein | 97%            | 42.19% |             |       |  |
|              |       | DN3904_c0_g1_i1.p1                     | 417               |                                         | 2               |     |            |                | 98%            | 42.17% |             |       |  |
| (SRR2072148) | (GIS) | DN5042_c0_g3_i1.p1                     | 767               | Erysiphe necator associated totivirus 7 | 1               | 796 | QJW70337   | RdRp           | 99%            | 46.87% | Totiviridae | dsRNA |  |
|              |       | DN5042_c0_g3_i1.p2                     | 267               | Totiviridae sp.                         | 1               | 693 | WAK77569.1 | capsid protein | 92%            | 37.85% |             |       |  |
|              |       | DN5042_c0_g2_i1.p1                     | 430               |                                         | 2               |     |            |                | 99%            | 42.19% |             |       |  |
|              |       | DN5042_c0_g1_i1.p1                     | 417               |                                         | 3               |     |            |                | 98%            | 42.17% |             |       |  |
| (SRR2072149) | (GIS) | DN3496_c1_g1_i1.p1                     | 767               | Erysiphe necator associated totivirus 7 | 1               | 796 | QJW70337   | RdRp           | 99%            | 46.87% | Totiviridae | dsRNA |  |
|              |       | DN3496_c1_g1_i1.p2                     | 688               | Totiviridae sp.                         | 1               | 693 | WAK77569.1 | capsid protein | 98%            | 40.00% |             |       |  |
| (SRR2072160) | (GIS) | DN1036_c0_g1_i1.p1                     | 767               | Erysiphe necator associated totivirus 7 | 1               | 796 | QJW70337   | RdRp           | 99%            | 46.87% | Totiviridae | dsRNA |  |
|              |       | DN1036_c0_g2_i1.p1                     | 262               | Totiviridae                             | 1               | 693 | WAK77569.1 | capsid         | 93%            | 40.98% |             |       |  |

|                      |                              |       |                                          |     |                                         |   |     |            |                |      |        |             |       |
|----------------------|------------------------------|-------|------------------------------------------|-----|-----------------------------------------|---|-----|------------|----------------|------|--------|-------------|-------|
|                      |                              |       | DN1036_c0_g1_i1.p2                       | 688 | sp.                                     | 2 |     |            | protein        | 98%  | 40.00% |             |       |
|                      | (SRR2072165)                 | (GIS) | DN1307_c0_g1_i1.p1                       | 767 | Erysiphe necator associated totivirus 7 | 1 | 796 | QJW70337   | RdRp           | 99%  | 46.87% | Totiviridae | dsRNA |
|                      |                              |       | DN1307_c0_g1_i1.p2                       | 688 | Totiviridae sp.                         | 1 | 693 | WAK77569.1 | capsid protein | 98%  | 40.00% |             |       |
|                      |                              |       | DN1307_c0_g2_i1.p1                       | 420 |                                         | 2 |     |            |                | 98%  | 42.17% |             |       |
|                      | (SRR2073308)                 | (GIS) | DN1099_c1_g2_i1.p1                       | 764 | Erysiphe necator associated totivirus 7 | 1 | 796 | QJW70337   | RdRp           | 99%  | 46.92% | Totiviridae | dsRNA |
|                      |                              |       | DN1099_c1_g3_i1.p1                       | 262 | Totiviridae sp.                         | 1 | 693 | WAK77569.1 | capsid protein | 93%  | 40.98% |             |       |
|                      |                              |       | DN1099_c1_g1_i2.p1                       | 437 |                                         | 2 |     |            |                | 97%  | 42.19% |             |       |
|                      |                              |       | DN1099_c1_g1_i1.p1                       | 420 |                                         | 3 |     |            |                | 98%  | 42.17% |             |       |
|                      | (SRR2073314)                 | (GIS) | DN5782_c1_g1_i1.p1                       | 767 | Erysiphe necator associated totivirus 7 | 1 | 796 | QJW70337   | RdRp           | 99%  | 46.87% | Totiviridae | dsRNA |
|                      |                              |       | DN5782_c1_g1_i1.p2                       | 688 | Totiviridae sp.                         | 1 | 693 | WAK77569.1 | capsid protein | 98%  | 40.00% |             |       |
|                      |                              |       | DN5782_c1_g2_i1.p1                       | 420 |                                         | 2 |     |            |                | 98%  | 42.17% |             |       |
|                      | (SRR2073323)                 | (GIS) | DN1391_c0_g1_i1.p1                       | 767 | Erysiphe necator associated totivirus 7 | 1 | 796 | QJW70337   | RdRp           | 99%  | 46.87% | Totiviridae | dsRNA |
|                      |                              |       | DN1391_c0_g2_i1.p1                       | 159 | Totiviridae sp.                         | 1 | 693 | WAK77569.1 | capsid protein | 97%  | 42.58% |             |       |
|                      |                              |       | DN1391_c0_g1_i1.p2                       | 688 |                                         | 2 |     |            |                | 98%  | 40.00% |             |       |
|                      | (SRR2073327)                 |       | DN910_c0_g3_i1.p1                        | 767 | Erysiphe necator associated totivirus 7 | 1 | 796 | QJW70337   | RdRp           | 99%  | 46.87% | Totiviridae | dsRNA |
|                      |                              |       | DN910_c0_g2_i1.p1                        | 429 | Totiviridae sp.                         | 1 | 693 | WAK77569.1 | capsid protein | 97%  | 41.89% |             |       |
|                      |                              |       | DN910_c0_g1_i1.p1                        | 446 |                                         | 1 |     |            |                | 97%  | 42.19% |             |       |
| Malassezia restricta | PRJNA577935<br>(SRR10294524) | (SNU) | DN1447_c0_g1_i2.p1                       | 160 | Malassezia restricta virus MrV40L       | 1 | 862 | QJA42331   | RdRp           | 99%  | 100%   | Totiviridae | dsRNA |
|                      |                              |       | DN1206_c1_g9_i2.p1                       | 120 | Malassezia restricta virus MrV40L       | 1 | 689 | QJA42330   | capsid protein | 100% | 100%   |             |       |
|                      | PRJNA593855<br>(SRR10597458) | (SNU) | DN296_c0_g1_i1.p1 ,<br>DN296_c0_g2_i1.p1 | 691 | Totiviridae sp.                         | 2 | 790 | WAK77294.1 | polyprotein    | 99%  | 49.64% | Totiviridae | dsRNA |
|                      |                              |       | DN296_c0_g2_i1.p2                        | 658 | Totiviridae sp.                         | 1 | 691 | WAK77450.1 | capsid protein | 98%  | 43.16% |             |       |
|                      |                              |       | DN296_c0_g1_i1.p2                        | 598 |                                         | 2 |     |            |                | 99%  | 42.24% |             |       |
|                      |                              |       | DN1846_c0_g1_i1.p1                       | 466 | Dali Totiv tick virus 1                 | 1 | 690 | UYL95681.1 | capsid protein | 100% | 84.28% |             |       |
|                      |                              |       | DN1846_c0_g2_i1.p1                       | 378 |                                         | 2 |     |            |                | 100% | 84.62% |             |       |
|                      | (SRR10597459)                | (SNU) | DN1827_c0_g1_i1.p1                       | 433 | Totiviridae sp.                         | 1 | 790 | WAK77294.1 | polyprotein    | 93%  | 60.81% | Totiviridae | dsRNA |
|                      |                              |       | DN1827_c0_g2_i1.p1                       | 501 |                                         | 2 |     |            |                | 99%  | 57.06% |             |       |
|                      |                              |       | DN4_c0_g2_i1.p1                          | 510 | Totiviridae sp.                         | 1 | 691 | WAK77450.1 | capsid protein | 96%  | 42.80% |             |       |
|                      |                              |       | DN122_c0_g2_i1.p1                        | 587 | Dali Totiv tick virus 1                 | 1 | 690 | UYL95681.1 | capsid protein | 100% | 83.79% |             |       |
|                      |                              |       | DN122_c0_g2_i2.p1                        | 562 |                                         | 2 |     |            |                | 98%  | 84.2%  |             |       |
