# Supplementary material for: Tracking Mycoviruses in Public RNAseq Datasets of Malassezia: Three Original Totiviruses Revealed
Source: MDPI journal article supplement (doi:10.3390/v15061368), 2023-06-13
Supplement: s1 [file s1]

**Supplementary Table S3.** Comparison of Chargaff's Ratio (GC%) between identified sequences and closely related species.

| Virus-associated contigs | Chargaff's Ratio GC (%) of virus associated contigs | Chargaff's Ratio GC (%) of the closest viral species |
|--------------------------|-----------------------------------------------------|------------------------------------------------------|
| MgaTV1_RdRP              | 49.2                                                | EnaT7<br>41.9                                        |
| MgaTV1_CP                | 49.5                                                | Totiviridae sp.<br>49.8                              |
| MraTV1_CP                | 48.3                                                | Totiviridae sp.<br>46.2                              |
| MraTV1_polyprotein       | 50.2                                                |                                                      |
| MraTV2_CP                | 44                                                  | Dali Totiv tick virus 1<br>42.5                      |
| MrV40L_RdRP              | 45.4                                                | MrV40L<br>46.3                                       |
| MrV40L_CP                | 43.7                                                |                                                      |

**Supplementary Table S4.** Functional annotation of candidate viral ORFs using PHYRE2.

| Virus associated ORFs | Best hits                                                                                                                     | Confidence | %id |
|-----------------------|-------------------------------------------------------------------------------------------------------------------------------|------------|-----|
| MgaTV1_RdRP           | <b>PDB header:</b> viral protein, replication<br><b>Chain:</b> A: <b>PDB Molecule:</b> potential rna-dependent rna polymerase | 100.0      | 20  |
| MgaTV1_CP             | <b>Fold:</b> L-A virus major coat protein<br><b>Superfamily:</b> L-A virus major coat protein                                 | 100.0      | 22  |
| MraTV1_CP             | <b>Fold:</b> DNA/RNA polymerases<br><b>Family:</b> RNA-dependent RNA-polymerase                                               | 100.0      | 23  |
| MraTV2_CP             | <b>Fold:</b> L-A virus major coat protein<br><b>Superfamily:</b> L-A virus major coat protein                                 | 82.2       | 22  |
| MraTV1_Polyprotein    | <b>PDB header:</b> hydrolase<br><b>Chain:</b> A: <b>PDB Molecule:</b> rna-directed rna polymerase                             | 99.7       | 17  |
| MrV40L_RdRP           | <b>Fold:</b> DNA/RNA polymerases<br><b>Family:</b> RNA-dependent RNA-polymerase                                               | 95.6       | 27  |
| MrV40L_CP             | <b>Fold:</b> L-A virus major coat protein<br><b>Superfamily:</b> L-A virus major coat protein                                 | 90.3       | 34  |

**Supplementary Table S5.** List of accession numbers of closely-related Totiviruses used for the phylogenetic tree reconstruction (RdRP and CP).

| Genus               | Species (strain abbreviation)                               | RNA-dependent RNA-polymerase (RdRP) | Capsid protein (CP) |
|---------------------|-------------------------------------------------------------|-------------------------------------|---------------------|
| <i>Totivirus</i>    | Dali Totiv tick virus 1 (DTtV1)                             | -                                   | UYL95681.1          |
|                     | Delisea pulchra totivirus IndA (DpT_IndA)                   | AMB17468                            | -                   |
|                     | Erysiphales associated mitovirus 1 (EaM1)                   | QIP68035.1                          | -                   |
|                     | Erysiphales associated totivirus 1 (EnaT1)                  | QIP68044                            | -                   |
|                     | Erysiphe necator associated totivirus 6 (EnaT6)             | QJW70335                            | -                   |
|                     | Erysiphe necator associated totivirus 7 (EnaT7)             | QJW70337.1                          | -                   |
|                     | Erysiphe necator associated totivirus 8 (EnaT8)             | QJW70339                            | -                   |
|                     | Erysiphales associated totivirus 13 (EnaT13)                | QIP68067                            | -                   |
|                     | Phakopsora pachyrhizi mycovirus (PpM)                       | ALO81041.1                          | QED43015.1          |
|                     | Red clover powdery mildew-associated totivirus 3 (RcpmaTV3) | YP_009182181.1                      | YP_009182180        |
|                     | Saccharomyces cerevisiae virus L-BC (La) (ScV-La)           | NP_042581                           | NP_042580           |
|                     | Scheffersomyces segobiensis virus L (SsVL)                  | YP_009507831                        | YP_009507830        |
|                     | Totiviridae sp.1                                            | WAK77294.1                          | -                   |
|                     | Totiviridae sp.2                                            | -                                   | WAK77569.1          |
|                     | Totiviridae sp.3                                            | -                                   | WAK77450.1          |
|                     | Totivirus sp.                                               | QOQ37359                            | QOQ37361.1          |
|                     | Tuber aestivum virus 1 (TaV1)                               | YP_009507833.1                      | YP_009507832        |
|                     | Xanthophyllomyces dendrorhous virus L1A (XdVL1A)            | YP_007697651.1                      | AFH09411.1          |
|                     | Xanthophyllomyces dendrorhous virus L1B (XdVL1B)            | YP_009507835.1                      | YP_009507834.1      |
|                     |                                                             |                                     |                     |
| <i>Giardiavirus</i> | Drosophila melanogaster totivirus (DTV)                     | YP_003289293.1                      | UFT26918.1          |
|                     | Golden shiner totivirus (GSTV)                              | YP_009256209.1                      | -                   |
|                     | Omono River virus (OMRV)                                    | AUI11418.1                          | AUI11420.1          |
|                     | Tianjin totivirus (ToV)                                     | YP_005454251.1                      | YP_005454250.1      |
| <i>Victorivirus</i> | Gremmeniella abietina virus L1 (GaRV-L1)                    | AAK11656.1                          | -                   |
|                     | Helicobasidium mompa totivirus 1-17 (HmV-17)                | BAC81754.1                          | -                   |

|                                  |                                               |            |            |
|----------------------------------|-----------------------------------------------|------------|------------|
|                                  | Macrophomina phaseolina victorivirus 1 (MpV1) | QKI37143.1 | -          |
|                                  | Magnaporthe oryzae virus 1 (MoV1)             | BAD60833.1 | -          |
| Unclassified<br><i>Totivirus</i> | Malassezia restricta virus MrV40L (MrV40L)    | QJA42331.1 | QJA42330.1 |
|                                  | Malassezia sympodialis mycovirus (MsMV1)      | QNJ34609   | QNJ34608.1 |
| <i>Reoviridae</i>                | Human rotavirus A (ROTHA)                     | ACR22792   | AIQ80953.1 |
